# Supplementary figures and images for: A Novel Recombinant Chimeric Proteinous Bio-adhesive Consisting of Mussel Foot Protein 3, 5 and Curli Proteins GvpA and CsgA Expressed in Pichia Pastoris
Source: Research Square preprint supplement (doi:10.21203/rs.3.rs-640628/v1), 2021-07-08

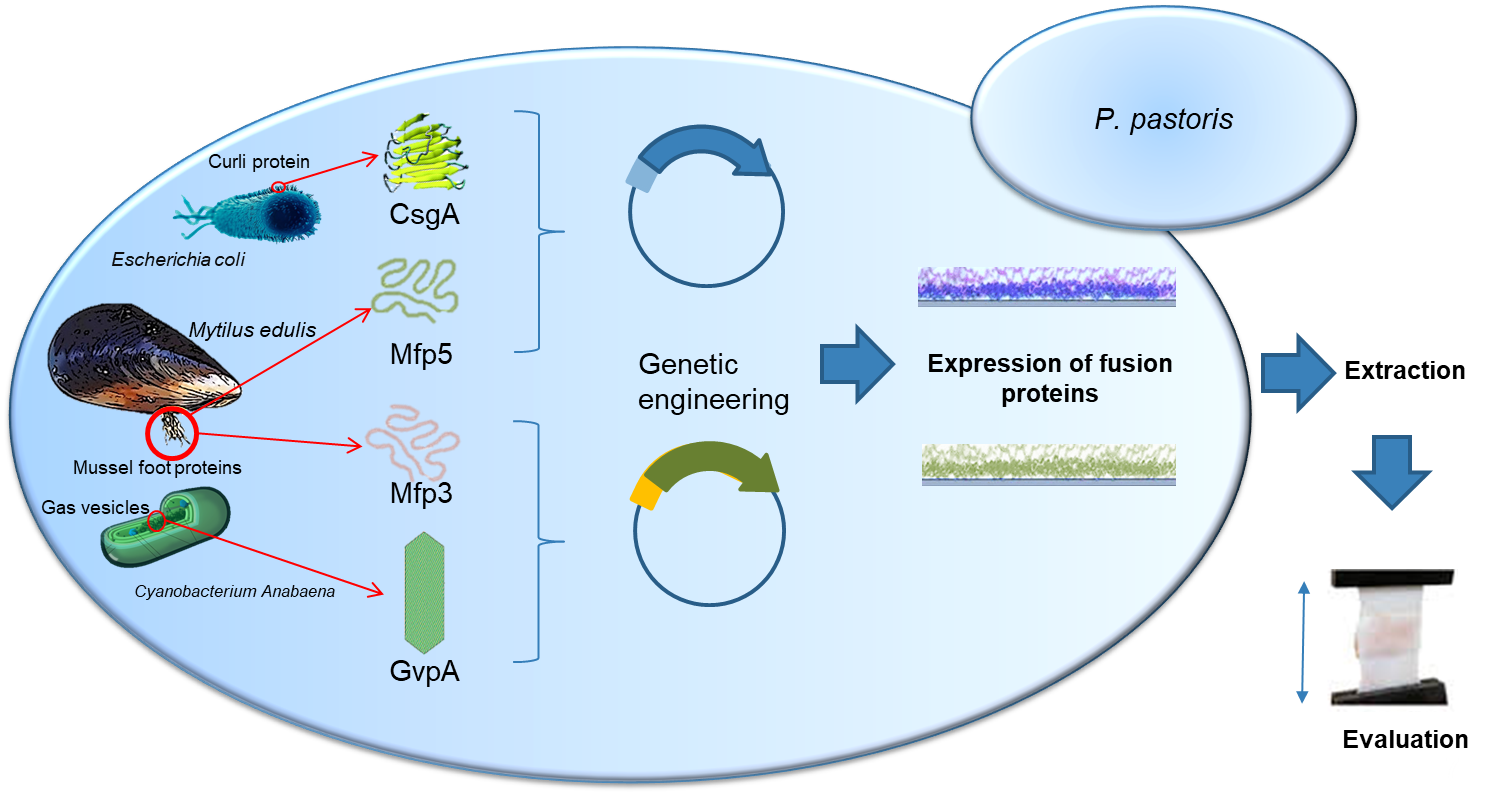

Supplement: Supplementary file 1 [file f575b8d5fac9a49fc5db151d.docx]
